# Supplementary material
Source: PubMed Central journal article supplement (PMC2034667)

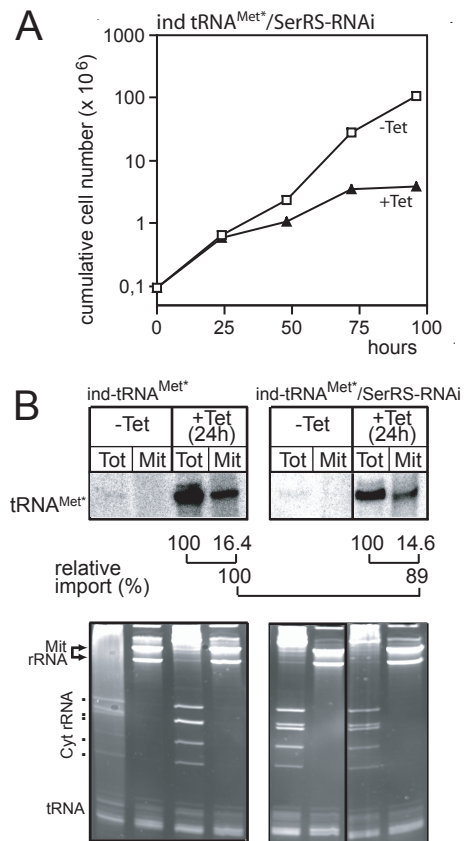

Supplementary Figure 1

Supplement: 7601857s1.pdf [file 7601857s1.pdf]
